Baseline

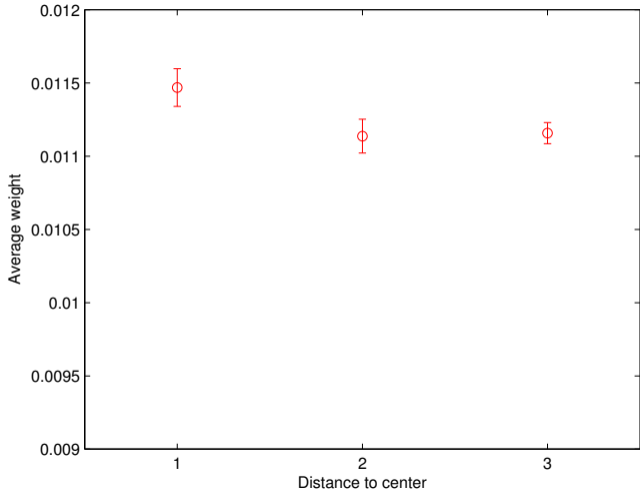

Output balancing disabled

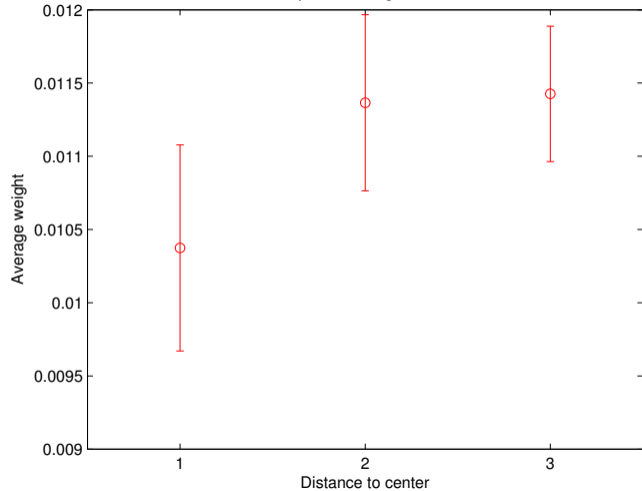

Source: https://storage.googleapis.com/plos-corpus-prod/10.1371/journal.pcbi.1005705/2/pcbi.1005705.s001.pdf
